# Supplementary material for: Fabrication and Characterisation of a Photo-Responsive, Injectable Nanosystem for Sustained Delivery of Macromolecules
Source: PubMed Central journal article supplement (PMC8037466; doi:10.3390/ijms22073359), 2021-03-25
Supplement: ijms-22-03359-s001.pdf [file ijms-22-03359-s001.pdf]

## Fabrication and Characterisation of a Photo-Responsive, Injectable Nanosystem for Sustained Delivery of Macromolecules

Pakama Mahlumba <sup>1</sup>, Pradeep Kumar <sup>1</sup>, Lisa C. du Toit <sup>1</sup>, Madan S. Poka <sup>2</sup>, Philemon Ubanako <sup>1</sup> and Yahya E. Choonara <sup>1,\*</sup>

<sup>1</sup> Wits Advanced Drug Delivery Platform Research Unit, Department of Pharmacy and Pharmacology, School of Therapeutic Science, Faculty of Health Sciences, University of the Witwatersrand, Johannesburg, 7 York road, Parktown, 2193, South Africa

<sup>2</sup> Division of Pharmaceutical Sciences, School of Pharmacy, Sefako Makgatho Health Sciences University, Pretoria 0208, South Africa

### \*Corresponding Author:

Professor Yahya E. Choonara

Tel: +27-11-717-2052

Fax: +27-11-642-4355

Email: yahya.choonara@wits.ac.za

### Supplementary material

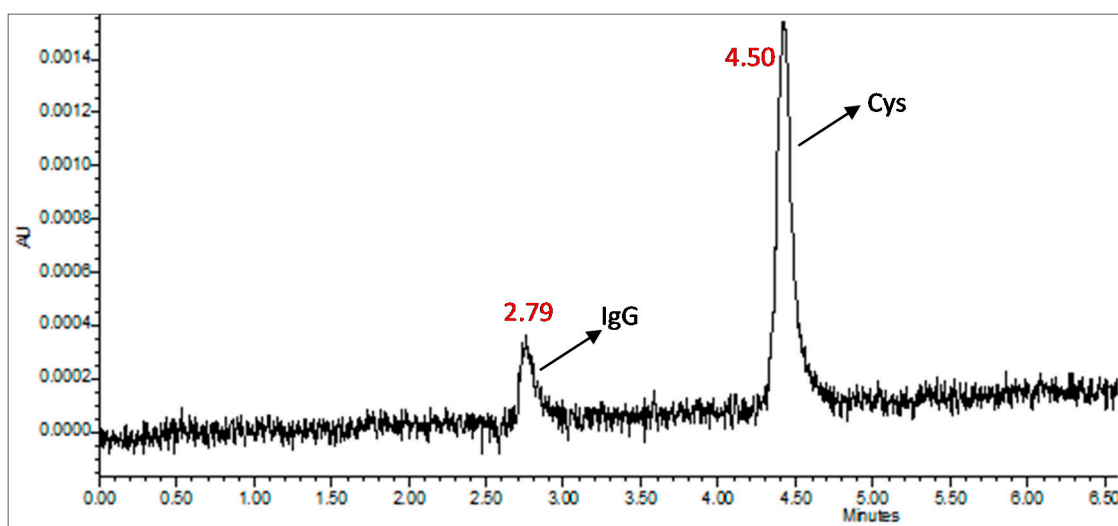

Figure S1: Separation chromatogram of IgG.
